# Supplementary material
Source: HighWire-hosted journal article supplement (https://bmjopen.bmj.com/content/12/5/e053043)
Supplement: inline-supplementary-material-1 [file inline-supplementary-material-1.pdf]

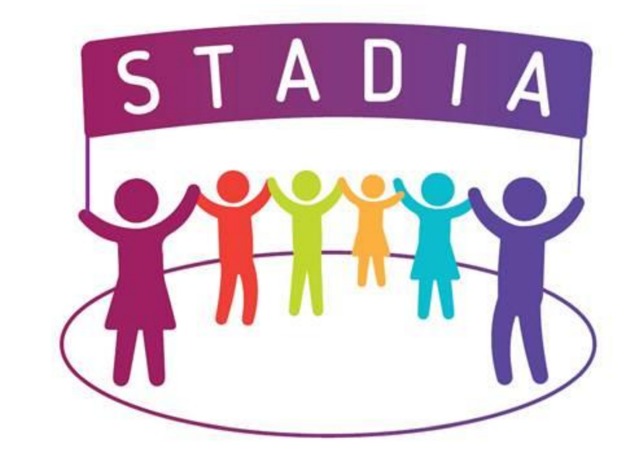

## STAndardised Diagnostic Assessment for children and adolescents with emotional difficulties (STADIA): a multi-centre randomised controlled trial

### SCREENING

|                          |                                                        |
|--------------------------|--------------------------------------------------------|
| <b>Site Number:</b>      | <input type="text"/>                                   |
| <b>Screening Number:</b> | <input type="text"/>                                   |
| <b>Sponsor:</b>          | <b>Nottinghamshire Healthcare NHS Foundation Trust</b> |
| <b>CRF Version:</b>      | <b>Final v1.1 – 30 April 2019</b>                      |

Site Number:

|  |  |  |
|--|--|--|
|  |  |  |
|--|--|--|

Screening Number:

|  |  |  |  |
|--|--|--|--|
|  |  |  |  |
|--|--|--|--|

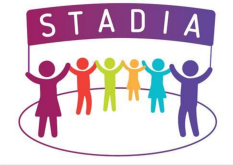

| REFERRAL SCREENING                                                                                                                                                                                                                                                                              |                                                                                                                                                                                                                                                                                                                                                                                                                                                                                                                                                                                                                                                                                                                                                                                                                                                                                                                                                                                                                                                                                                                                                                                                                                                                                         |  |  |  |  |  |  |  |  |  |  |  |  |  |  |  |  |  |  |  |  |  |
|-------------------------------------------------------------------------------------------------------------------------------------------------------------------------------------------------------------------------------------------------------------------------------------------------|-----------------------------------------------------------------------------------------------------------------------------------------------------------------------------------------------------------------------------------------------------------------------------------------------------------------------------------------------------------------------------------------------------------------------------------------------------------------------------------------------------------------------------------------------------------------------------------------------------------------------------------------------------------------------------------------------------------------------------------------------------------------------------------------------------------------------------------------------------------------------------------------------------------------------------------------------------------------------------------------------------------------------------------------------------------------------------------------------------------------------------------------------------------------------------------------------------------------------------------------------------------------------------------------|--|--|--|--|--|--|--|--|--|--|--|--|--|--|--|--|--|--|--|--|--|
| <i>Complete for <u>all</u> referrals screened for eligibility:</i>                                                                                                                                                                                                                              |                                                                                                                                                                                                                                                                                                                                                                                                                                                                                                                                                                                                                                                                                                                                                                                                                                                                                                                                                                                                                                                                                                                                                                                                                                                                                         |  |  |  |  |  |  |  |  |  |  |  |  |  |  |  |  |  |  |  |  |  |
| NHS Number<br><i>Local use only</i>                                                                                                                                                                                                                                                             | _____                                                                                                                                                                                                                                                                                                                                                                                                                                                                                                                                                                                                                                                                                                                                                                                                                                                                                                                                                                                                                                                                                                                                                                                                                                                                                   |  |  |  |  |  |  |  |  |  |  |  |  |  |  |  |  |  |  |  |  |  |
| Trust Number<br><i>Local use only</i>                                                                                                                                                                                                                                                           | _____                                                                                                                                                                                                                                                                                                                                                                                                                                                                                                                                                                                                                                                                                                                                                                                                                                                                                                                                                                                                                                                                                                                                                                                                                                                                                   |  |  |  |  |  |  |  |  |  |  |  |  |  |  |  |  |  |  |  |  |  |
| Date of referral receipt<br>(dd-mmm-yyyy)                                                                                                                                                                                                                                                       | <table border="1" style="display: inline-table; border-collapse: collapse;"> <tr> <td style="width: 20px; height: 20px;"></td> </tr> </table> - <table border="1" style="display: inline-table; border-collapse: collapse;"> <tr> <td style="width: 20px; height: 20px;"></td> </tr> </table> - <table border="1" style="display: inline-table; border-collapse: collapse;"> <tr> <td style="width: 20px; height: 20px;"></td> </tr> </table> |  |  |  |  |  |  |  |  |  |  |  |  |  |  |  |  |  |  |  |  |  |
|                                                                                                                                                                                                                                                                                                 |                                                                                                                                                                                                                                                                                                                                                                                                                                                                                                                                                                                                                                                                                                                                                                                                                                                                                                                                                                                                                                                                                                                                                                                                                                                                                         |  |  |  |  |  |  |  |  |  |  |  |  |  |  |  |  |  |  |  |  |  |
|                                                                                                                                                                                                                                                                                                 |                                                                                                                                                                                                                                                                                                                                                                                                                                                                                                                                                                                                                                                                                                                                                                                                                                                                                                                                                                                                                                                                                                                                                                                                                                                                                         |  |  |  |  |  |  |  |  |  |  |  |  |  |  |  |  |  |  |  |  |  |
|                                                                                                                                                                                                                                                                                                 |                                                                                                                                                                                                                                                                                                                                                                                                                                                                                                                                                                                                                                                                                                                                                                                                                                                                                                                                                                                                                                                                                                                                                                                                                                                                                         |  |  |  |  |  |  |  |  |  |  |  |  |  |  |  |  |  |  |  |  |  |
| Date of screening<br>(dd-mmm-yyyy)                                                                                                                                                                                                                                                              | <table border="1" style="display: inline-table; border-collapse: collapse;"> <tr> <td style="width: 20px; height: 20px;"></td> </tr> </table> - <table border="1" style="display: inline-table; border-collapse: collapse;"> <tr> <td style="width: 20px; height: 20px;"></td> </tr> </table> - <table border="1" style="display: inline-table; border-collapse: collapse;"> <tr> <td style="width: 20px; height: 20px;"></td> </tr> </table>                                              |  |  |  |  |  |  |  |  |  |  |  |  |  |  |  |  |  |  |  |  |  |
|                                                                                                                                                                                                                                                                                                 |                                                                                                                                                                                                                                                                                                                                                                                                                                                                                                                                                                                                                                                                                                                                                                                                                                                                                                                                                                                                                                                                                                                                                                                                                                                                                         |  |  |  |  |  |  |  |  |  |  |  |  |  |  |  |  |  |  |  |  |  |
|                                                                                                                                                                                                                                                                                                 |                                                                                                                                                                                                                                                                                                                                                                                                                                                                                                                                                                                                                                                                                                                                                                                                                                                                                                                                                                                                                                                                                                                                                                                                                                                                                         |  |  |  |  |  |  |  |  |  |  |  |  |  |  |  |  |  |  |  |  |  |
|                                                                                                                                                                                                                                                                                                 |                                                                                                                                                                                                                                                                                                                                                                                                                                                                                                                                                                                                                                                                                                                                                                                                                                                                                                                                                                                                                                                                                                                                                                                                                                                                                         |  |  |  |  |  |  |  |  |  |  |  |  |  |  |  |  |  |  |  |  |  |
| Young person's sex                                                                                                                                                                                                                                                                              | Male <input type="checkbox"/><br>Female <input type="checkbox"/>                                                                                                                                                                                                                                                                                                                                                                                                                                                                                                                                                                                                                                                                                                                                                                                                                                                                                                                                                                                                                                                                                                                                                                                                                        |  |  |  |  |  |  |  |  |  |  |  |  |  |  |  |  |  |  |  |  |  |
| Young person's age<br><i>If &lt;5 or &gt;17 do not proceed</i>                                                                                                                                                                                                                                  | <table border="1" style="display: inline-table; border-collapse: collapse;"> <tr> <td style="width: 20px; height: 20px;"></td> <td style="width: 20px; height: 20px;"></td> <td style="width: 20px; height: 20px;"></td> </tr> </table>                                                                                                                                                                                                                                                                                                                                                                                                                                                                                                                                                                                                                                                                                                                                                                                                                                                                                                                                                                                                                                                 |  |  |  |  |  |  |  |  |  |  |  |  |  |  |  |  |  |  |  |  |  |
|                                                                                                                                                                                                                                                                                                 |                                                                                                                                                                                                                                                                                                                                                                                                                                                                                                                                                                                                                                                                                                                                                                                                                                                                                                                                                                                                                                                                                                                                                                                                                                                                                         |  |  |  |  |  |  |  |  |  |  |  |  |  |  |  |  |  |  |  |  |  |
| Has the young person been previously enrolled and randomised in the STADIA trial?<br><i>If yes, do not proceed</i>                                                                                                                                                                              | Yes <input type="checkbox"/><br>No <input type="checkbox"/>                                                                                                                                                                                                                                                                                                                                                                                                                                                                                                                                                                                                                                                                                                                                                                                                                                                                                                                                                                                                                                                                                                                                                                                                                             |  |  |  |  |  |  |  |  |  |  |  |  |  |  |  |  |  |  |  |  |  |
| Does the referral mention any of the following Covid-19 related words/phrases?<br><i>Tick all that apply.</i>                                                                                                                                                                                   |                                                                                                                                                                                                                                                                                                                                                                                                                                                                                                                                                                                                                                                                                                                                                                                                                                                                                                                                                                                                                                                                                                                                                                                                                                                                                         |  |  |  |  |  |  |  |  |  |  |  |  |  |  |  |  |  |  |  |  |  |
| Covid-19 / Covid                                                                                                                                                                                                                                                                                | <input type="checkbox"/>                                                                                                                                                                                                                                                                                                                                                                                                                                                                                                                                                                                                                                                                                                                                                                                                                                                                                                                                                                                                                                                                                                                                                                                                                                                                |  |  |  |  |  |  |  |  |  |  |  |  |  |  |  |  |  |  |  |  |  |
| Coronavirus                                                                                                                                                                                                                                                                                     | <input type="checkbox"/>                                                                                                                                                                                                                                                                                                                                                                                                                                                                                                                                                                                                                                                                                                                                                                                                                                                                                                                                                                                                                                                                                                                                                                                                                                                                |  |  |  |  |  |  |  |  |  |  |  |  |  |  |  |  |  |  |  |  |  |
| Lockdown                                                                                                                                                                                                                                                                                        | <input type="checkbox"/>                                                                                                                                                                                                                                                                                                                                                                                                                                                                                                                                                                                                                                                                                                                                                                                                                                                                                                                                                                                                                                                                                                                                                                                                                                                                |  |  |  |  |  |  |  |  |  |  |  |  |  |  |  |  |  |  |  |  |  |
| School closure / exams cancelled                                                                                                                                                                                                                                                                | <input type="checkbox"/>                                                                                                                                                                                                                                                                                                                                                                                                                                                                                                                                                                                                                                                                                                                                                                                                                                                                                                                                                                                                                                                                                                                                                                                                                                                                |  |  |  |  |  |  |  |  |  |  |  |  |  |  |  |  |  |  |  |  |  |
| Does the referral mention emotional difficulties*?<br><i>If no, do not proceed</i>                                                                                                                                                                                                              | Yes <input type="checkbox"/><br>No <input type="checkbox"/>                                                                                                                                                                                                                                                                                                                                                                                                                                                                                                                                                                                                                                                                                                                                                                                                                                                                                                                                                                                                                                                                                                                                                                                                                             |  |  |  |  |  |  |  |  |  |  |  |  |  |  |  |  |  |  |  |  |  |
| Is this an emergency or urgent referral (according to local CAMHS triage / SPA team risk assessment)?<br><i>If yes, do not proceed</i>                                                                                                                                                          | Yes <input type="checkbox"/><br>No <input type="checkbox"/>                                                                                                                                                                                                                                                                                                                                                                                                                                                                                                                                                                                                                                                                                                                                                                                                                                                                                                                                                                                                                                                                                                                                                                                                                             |  |  |  |  |  |  |  |  |  |  |  |  |  |  |  |  |  |  |  |  |  |
| Does the young person have severe learning disability (e.g., the referral mentions this or that they attend a special school for children with severe learning difficulties)?<br><i>If 'yes' do not proceed</i><br><i>If not known, confirm during telephone eligibility check at enrolment</i> | Yes <input type="checkbox"/><br>No <input type="checkbox"/><br>Not known <input type="checkbox"/>                                                                                                                                                                                                                                                                                                                                                                                                                                                                                                                                                                                                                                                                                                                                                                                                                                                                                                                                                                                                                                                                                                                                                                                       |  |  |  |  |  |  |  |  |  |  |  |  |  |  |  |  |  |  |  |  |  |

Site Number:

|  |  |
|--|--|
|  |  |
|--|--|

Screening Number:

|  |  |  |  |
|--|--|--|--|
|  |  |  |  |
|--|--|--|--|



| REFERRAL SCREENING                                                                                                                                                                                                                                         |                                                                                                                                                 |
|------------------------------------------------------------------------------------------------------------------------------------------------------------------------------------------------------------------------------------------------------------|-------------------------------------------------------------------------------------------------------------------------------------------------|
| If the young person is <16:<br>Does the referral information include contact details for a named parent/carer?<br><i>If 'no' await parent/carer contact details before proceeding</i>                                                                      | Yes <input type="checkbox"/><br>No <input type="checkbox"/><br>N/A <input type="checkbox"/>                                                     |
| If the young person is <16:<br>Is the named parent/carer a local authority representative designated to care for the child/young person?<br><i>If 'yes' do not proceed</i><br><i>If not known, confirm during telephone eligibility check at enrolment</i> | Yes <input type="checkbox"/><br>No <input type="checkbox"/><br>Not known <input type="checkbox"/><br>N/A <input type="checkbox"/>               |
| If the young person is aged 16 or 17:<br>Whose contact details are given on the referral form?<br><i>If young person contact details are provided, they should be contacted in the first instance</i>                                                      | Young person <input type="checkbox"/><br>Parent/carer <input type="checkbox"/><br>Both <input type="checkbox"/><br>N/A <input type="checkbox"/> |

| EMOTIONAL DIFFICULTIES                                                                                                                                                                                                        |                          |
|-------------------------------------------------------------------------------------------------------------------------------------------------------------------------------------------------------------------------------|--------------------------|
| <i>*Emotional difficulties may be indicated by the use of any of the following key words or phrases.<br/>           Tick all that apply. If 'other' record details and seek advice from the PI or NCTU before proceeding.</i> |                          |
| None                                                                                                                                                                                                                          | <input type="checkbox"/> |
| Agitated / agitation                                                                                                                                                                                                          | <input type="checkbox"/> |
| Anger                                                                                                                                                                                                                         | <input type="checkbox"/> |
| Anxiety / anxious / generalised anxiety                                                                                                                                                                                       | <input type="checkbox"/> |
| Avoids things/people/places                                                                                                                                                                                                   | <input type="checkbox"/> |
| Can't leave the house                                                                                                                                                                                                         | <input type="checkbox"/> |
| Completing rituals / asking parents to carry out rituals                                                                                                                                                                      | <input type="checkbox"/> |
| Compulsions                                                                                                                                                                                                                   | <input type="checkbox"/> |
| Depressed / depression / low / low mood / sad                                                                                                                                                                                 | <input type="checkbox"/> |
| Difficulties sleeping                                                                                                                                                                                                         | <input type="checkbox"/> |
| Distress                                                                                                                                                                                                                      | <input type="checkbox"/> |
| Fears and worries / fears relating to safety (germs, fire)                                                                                                                                                                    | <input type="checkbox"/> |
| Feeling low                                                                                                                                                                                                                   | <input type="checkbox"/> |
| Feels flat / empty / blank                                                                                                                                                                                                    | <input type="checkbox"/> |

Site Number:

|  |  |  |
|--|--|--|
|  |  |  |
|--|--|--|

Screening Number:

|  |  |  |  |
|--|--|--|--|
|  |  |  |  |
|--|--|--|--|

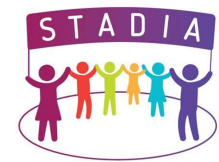

| <b>EMOTIONAL DIFFICULTIES</b>                                                                                                                                                                                      |                          |
|--------------------------------------------------------------------------------------------------------------------------------------------------------------------------------------------------------------------|--------------------------|
| <i>*Emotional difficulties may be indicated by the use of any of the following key words or phrases.<br/>Tick all that apply. If 'other' record details and seek advice from the PI or NCTU before proceeding.</i> |                          |
| Feels hopeless                                                                                                                                                                                                     | <input type="checkbox"/> |
| Feels worthless / stupid                                                                                                                                                                                           | <input type="checkbox"/> |
| Flashbacks                                                                                                                                                                                                         | <input type="checkbox"/> |
| Hypervigilance                                                                                                                                                                                                     | <input type="checkbox"/> |
| Irritable                                                                                                                                                                                                          | <input type="checkbox"/> |
| Low motivation                                                                                                                                                                                                     | <input type="checkbox"/> |
| Low self-esteem / Hates self                                                                                                                                                                                       | <input type="checkbox"/> |
| Mood swings / moody                                                                                                                                                                                                | <input type="checkbox"/> |
| Negative thoughts                                                                                                                                                                                                  | <input type="checkbox"/> |
| Nightmares (if trauma also present)                                                                                                                                                                                | <input type="checkbox"/> |
| No (or loss of) energy                                                                                                                                                                                             | <input type="checkbox"/> |
| No (or loss of) interest in things / gave up... / lack of wanting to do things                                                                                                                                     | <input type="checkbox"/> |
| Not going to school / unable to go to school                                                                                                                                                                       | <input type="checkbox"/> |
| Not sleeping / poor sleep                                                                                                                                                                                          | <input type="checkbox"/> |
| Obsessions                                                                                                                                                                                                         | <input type="checkbox"/> |
| OCD                                                                                                                                                                                                                | <input type="checkbox"/> |
| Phobia                                                                                                                                                                                                             | <input type="checkbox"/> |
| Panic / panic attacks                                                                                                                                                                                              | <input type="checkbox"/> |
| PTSD                                                                                                                                                                                                               | <input type="checkbox"/> |
| Self-harm / DSH / Cutting                                                                                                                                                                                          | <input type="checkbox"/> |
| Suicidal                                                                                                                                                                                                           | <input type="checkbox"/> |
| Suicidal thoughts / thoughts of ending life / thinks about killing self                                                                                                                                            | <input type="checkbox"/> |
| Tearful                                                                                                                                                                                                            | <input type="checkbox"/> |
| Thoughts of death                                                                                                                                                                                                  | <input type="checkbox"/> |

Site Number:

|  |  |  |
|--|--|--|
|  |  |  |
|--|--|--|

Screening Number:

|  |  |  |  |
|--|--|--|--|
|  |  |  |  |
|--|--|--|--|

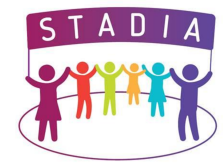

### EMOTIONAL DIFFICULTIES

*\*Emotional difficulties may be indicated by the use of any of the following key words or phrases.*

*Tick all that apply. If 'other' record details and seek advice from the PI or NCTU before proceeding.*

|                                                                    |                          |
|--------------------------------------------------------------------|--------------------------|
| Tiredness / fatigue                                                | <input type="checkbox"/> |
| Touching objects                                                   | <input type="checkbox"/> |
| Trauma                                                             | <input type="checkbox"/> |
| Weepy                                                              | <input type="checkbox"/> |
| Withdrawal / withdrawn                                             | <input type="checkbox"/> |
| Worried / worrying (incl. worries/concerns about their appearance) | <input type="checkbox"/> |
| Other (please specify)                                             | <input type="checkbox"/> |

**FOR ALL REFERRALS SCREENED, ENTER SUMMARY DATA ON THE SCREENING & ENROLMENT LOG.**

**IF THE YOUNG PERSON APPEARS TO BE ELIGIBLE PROCEED TO THE INVITATION TELEPHONE CALL (CALL 1) AND ENTER DETAILS ON THE TRIAL DATABASE.**

### SIGN-OFF STATEMENT

*Completed by the researcher conducting the referral screening.*

To the best of my knowledge, I confirm that I have made every reasonable effort to ensure that ALL of the data in this Case Record Form is a true, accurate and complete report.

|            |                                                                                                                                                                                                  |  |   |  |   |  |  |   |  |   |  |  |  |  |  |
|------------|--------------------------------------------------------------------------------------------------------------------------------------------------------------------------------------------------|--|---|--|---|--|--|---|--|---|--|--|--|--|--|
| Print Name |                                                                                                                                                                                                  |  |   |  |   |  |  |   |  |   |  |  |  |  |  |
| Signature  |                                                                                                                                                                                                  |  |   |  |   |  |  |   |  |   |  |  |  |  |  |
| Date       | <table border="1"> <tr> <td> </td> <td> </td> <td> </td> <td>-</td> <td> </td> <td> </td> <td> </td> <td> </td> <td>-</td> <td> </td> <td> </td> <td> </td> <td> </td> <td> </td> </tr> </table> |  |   |  | - |  |  |   |  | - |  |  |  |  |  |
|            |                                                                                                                                                                                                  |  | - |  |   |  |  | - |  |   |  |  |  |  |  |
