# Supplementary material
Source: HighWire-hosted journal article supplement (https://bmjopen.bmj.com/content/12/5/e053043)
Supplement: inline-supplementary-material-5 [file inline-supplementary-material-5.pdf]

## Appendix 5. Eligible emotional disorder diagnoses

|                                                                                            |
|--------------------------------------------------------------------------------------------|
| Anxiety disorder                                                                           |
| Separation anxiety disorder                                                                |
| Specific phobia (any)                                                                      |
| Social phobia or Social anxiety disorder                                                   |
| Agoraphobia                                                                                |
| Panic disorder (DSM5 additionally has Panic Attack with a specifier)                       |
| Phobic anxiety disorder (unspecified)                                                      |
| Selective mutism                                                                           |
| Generalized anxiety disorder                                                               |
| Obsessive-compulsive and related disorders                                                 |
| Body dysmorphic disorder                                                                   |
| Acute stress reaction                                                                      |
| Acute Stress Disorder                                                                      |
| Post-traumatic stress disorder                                                             |
| Adjustment Disorder                                                                        |
| Other anxiety disorder                                                                     |
| Mixed anxiety and depressive disorder                                                      |
| Depression                                                                                 |
| Depressive episode (any / mild / moderate / severe)                                        |
| Depressive disorder                                                                        |
| Recurrent depressive disorder (any / mild / moderate / severe)                             |
| Major Depressive disorder                                                                  |
| Persistent Depressive disorder                                                             |
| Other depressive episode                                                                   |
| Persistent mood (affective) disorder (including cyclothymic disorder / dysthymic disorder) |
| Other / Unspecified mood (affective) disorder                                              |
| Bipolar disorder                                                                           |
| Bipolar affective disorder                                                                 |
| Manic episode                                                                              |
| Childhood emotional disorder unspecified (F93.9)                                           |
