# Supplementary material
Source: HighWire-hosted journal article supplement (https://bmjopen.bmj.com/content/12/5/e053043)
Supplement: inline-supplementary-material-7 [file inline-supplementary-material-7.pdf]

## Appendix 7. Summary of assessments

| Time-point                                                          | Maximum 10 working days from referral receipt <sup>1</sup> |                           |                      | 6 months post-randomisation | 12 months post-randomisation |  |
|---------------------------------------------------------------------|------------------------------------------------------------|---------------------------|----------------------|-----------------------------|------------------------------|--|
| Activity                                                            | Screening and invitation                                   | Eligibility and enrolment | Consent and baseline | Randomisation               | Follow-Up                    |  |
| Initial eligibility screen of referral information                  | X                                                          |                           |                      |                             | Intervention                 |  |
| Telephone invitation to participate                                 | X                                                          |                           |                      |                             |                              |  |
| Verbal agreement to participate                                     |                                                            | X                         |                      |                             |                              |  |
| Confirm eligibility                                                 |                                                            | X                         |                      |                             |                              |  |
| Obtain enrolment data                                               |                                                            | X                         |                      |                             |                              |  |
| Participant enrolment                                               |                                                            | X                         |                      |                             |                              |  |
| Written informed consent/assent (online)                            |                                                            |                           | X                    |                             |                              |  |
| Baseline demographics (parent/carer and CYP aged 16 & 17)           |                                                            |                           | X                    |                             |                              |  |
| Mood and Feelings Questionnaire (MFQ)                               |                                                            |                           | X                    |                             |                              |  |
| Revised Child's Anxiety Depression Scale (RCADS)                    |                                                            |                           | X                    |                             |                              |  |
| Strengths and Difficulties Questionnaire (SDQ) <sup>2</sup>         |                                                            |                           | X                    |                             |                              |  |
| Child Revised Impact of Events Scale (CRIES-8)(42) <sup>3</sup>     |                                                            |                           | X                    |                             |                              |  |
| CYP self-report self-harm measure                                   |                                                            |                           | X                    |                             |                              |  |
| Patient Health Questionnaire (PHQ-9) - parent/carer only            |                                                            |                           | X                    |                             |                              |  |
| Generalised Anxiety Disorder Assessment (GAD-7) - parent/carer only |                                                            |                           | X                    |                             |                              |  |
| Child Health Utility 9D (CHU9D)                                     |                                                            |                           | X                    |                             |                              |  |
| EuroQoL-5D youth (EQ-5D-Y)                                          |                                                            |                           | X                    |                             |                              |  |
| EuroQoL-5D five level (EQ-5D-5L)                                    |                                                            |                           | X                    |                             |                              |  |
| Resource Use Questionnaire - parent/carer and CYP aged 16 & 17      |                                                            |                           | X                    |                             |                              |  |
| Data collection from records <sup>4</sup>                           |                                                            |                           | X                    |                             |                              |  |
|                                                                     |                                                            |                           |                      | Or                          |                              |  |
|                                                                     |                                                            |                           |                      |                             |                              |  |
|                                                                     |                                                            |                           |                      | Usual practice only         |                              |  |
|                                                                     |                                                            |                           |                      |                             |                              |  |
|                                                                     |                                                            |                           |                      |                             |                              |  |
|                                                                     |                                                            |                           |                      |                             |                              |  |

<sup>1</sup> For sites where the waiting time for the CAMHS acceptance decision usually exceeds 10 working days from referral receipt, recruitment activities may start and/or continue beyond 10 working days from referral receipt, providing the intervention period can be completed prior to the CAMHS referral decision.

<sup>2</sup> For participants in the intervention arm, the baseline SDQ will be collected as part of the DAWBA, completed post-randomisation.

<sup>3</sup> Additional data collection undertaken to explore post-traumatic stress disorder symptoms in CYP during the Covid-19 pandemic

<sup>4</sup> Data collection from records will be completed periodically throughout the 12 month follow-up period.
